# Supplementary material
Source: MDPI journal article supplement (https://www.mdpi.com/2410-3888/7/5/246)
Supplement: s1 [file s1]

Archive with 2 entries (2 files):
- fishes-1830067-supplementary materials.pdf
- Table S1. GO enrichment result.xlsx
