# Supplementary material
Source: MDPI journal article supplement (https://www.mdpi.com/2410-3888/7/5/246)
Supplement: s1 [file s1 › fishes-1830067-supplementary materials.pdf]

# Transcriptome Analysis of Immune Response against *Streptococcus agalactiae* Infection in the Nile Tilapia GIFT Strain

**Tao Zhou** <sup>1,2,3,†</sup>, **Zhihua Fang** <sup>1,2,3,†</sup>, **Daniel F. C. Duarte** <sup>4</sup>, **Stefan A. Fernandes** <sup>4</sup>, **Ying Lu** <sup>1,2,3</sup>, **Jing Guo** <sup>1,2,3</sup>, **Lang Gui** <sup>1,2,3,\*</sup> and **Liangbiao Chen** <sup>1,2,3,\*</sup>

- <sup>1</sup> Key Laboratory of Exploration and Utilization of Aquatic Genetic Resources, Ministry of Education, Shanghai Ocean University, Shanghai 201306, China
- <sup>2</sup> International Research Center for Marine Biosciences, Ministry of Science and Technology, Shanghai Ocean University, Shanghai 201306, China
- <sup>3</sup> National Demonstration Center for Experimental Fisheries Science Education, Shanghai Ocean University, Shanghai 201306, China
- <sup>4</sup> Faculty of Sciences and Technology, University of Algarve, 8005-139 Faro, Portugal
- \* Correspondence: lgui@shou.edu.cn (L.G.); lbchen@shou.edu.cn (L.C.)
- † These authors contributed equally to this article.

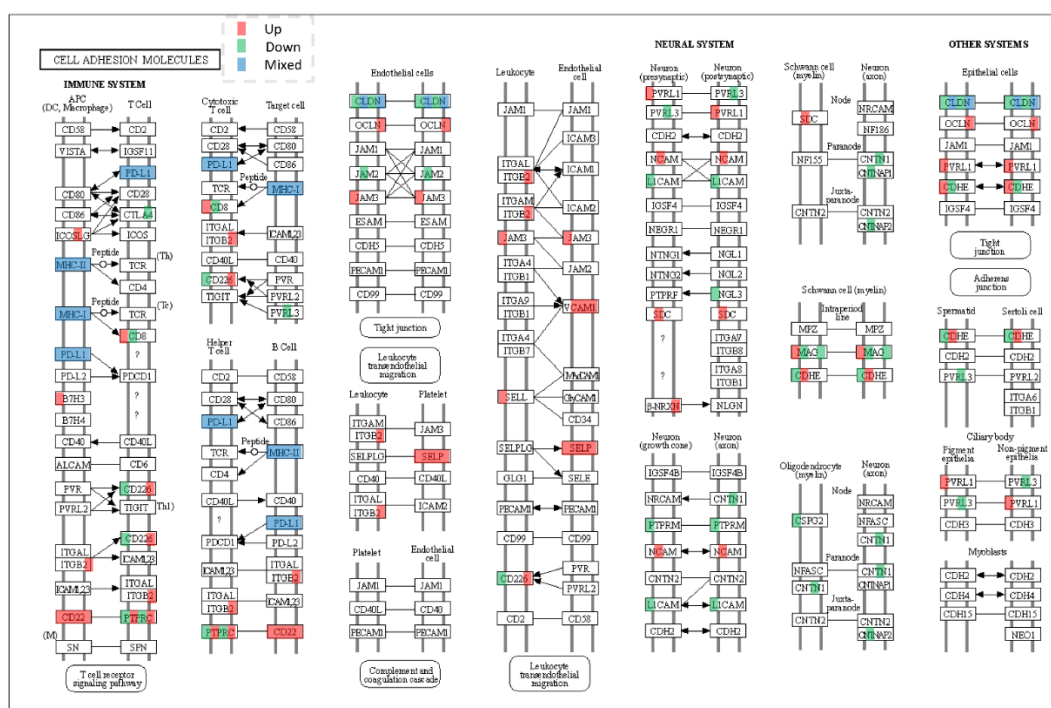

**Figure S1.** Color pathway of Cell adhesion molecules. The rectangles of putative protein were equally divided into four parts from left to right corresponding to four comparisons (B6h vs. P6h, B9h vs. P9h, B15h vs. P15h, and B18h vs. P18h). The green and red background colors in the rectangles represented the down-regulated and up-regulated genes, respectively. The blue background in the rectangles represented genes encoded this protein showed both upregulation and downregulation.

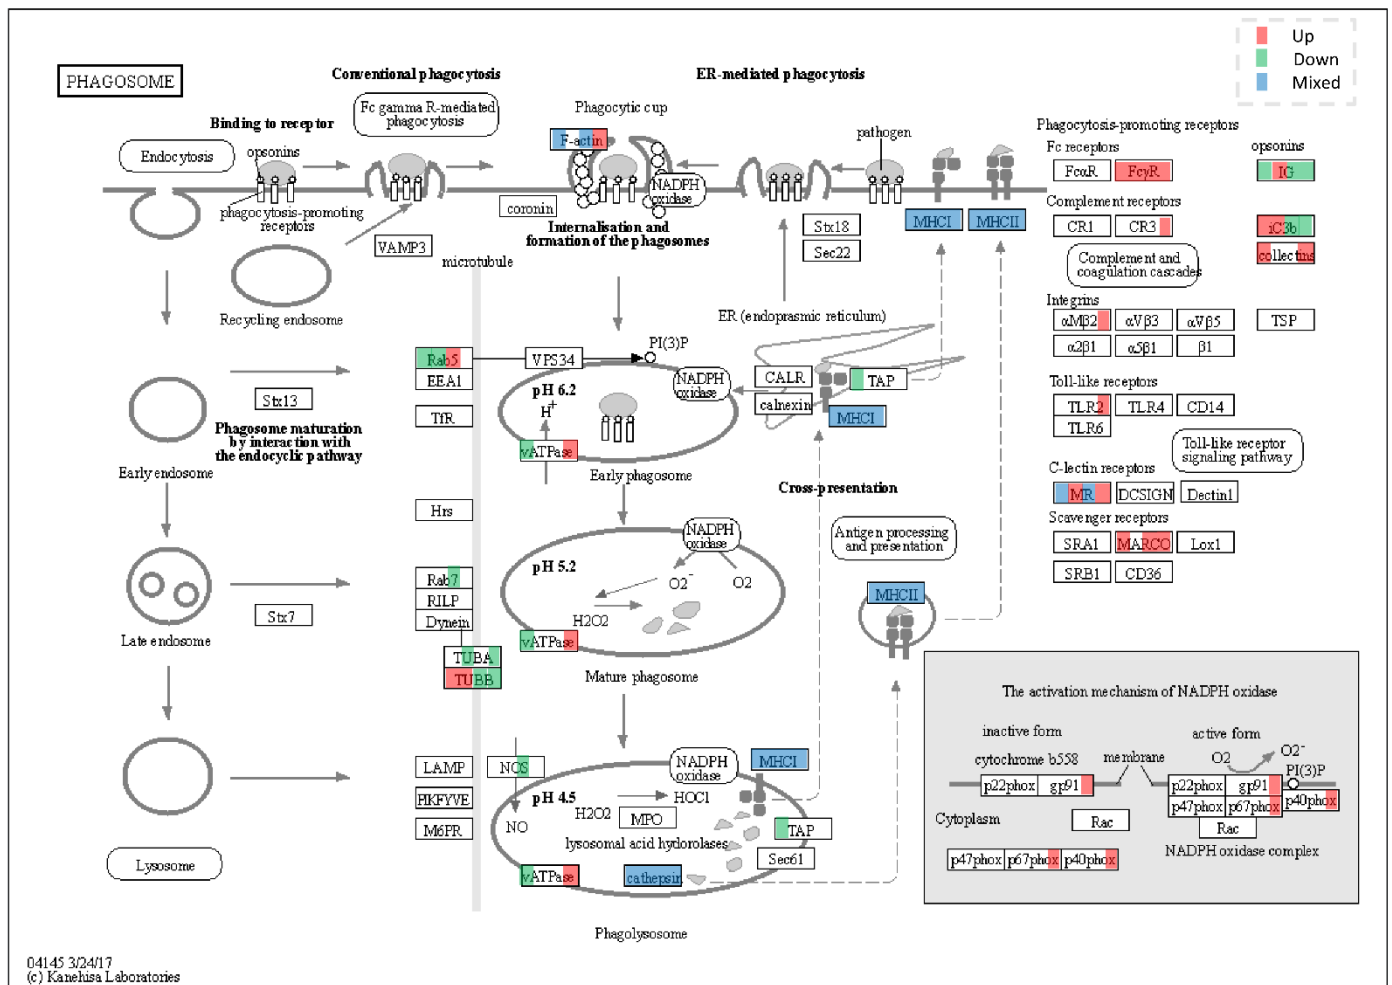

**Figure S2.** Color pathway of Phagosome. The rectangles of putative protein were equally divided into four parts from left to right corresponding to four comparisons (B6h vs. P6h, B9h vs. P9h, B15h vs. P15h, and B18h vs. P18h). The green and red background colors in the rectangles represented the down-regulated and up-regulated genes, respectively. The blue background in the rectangles represented genes encoded this protein showed both upregulation and downregulation.

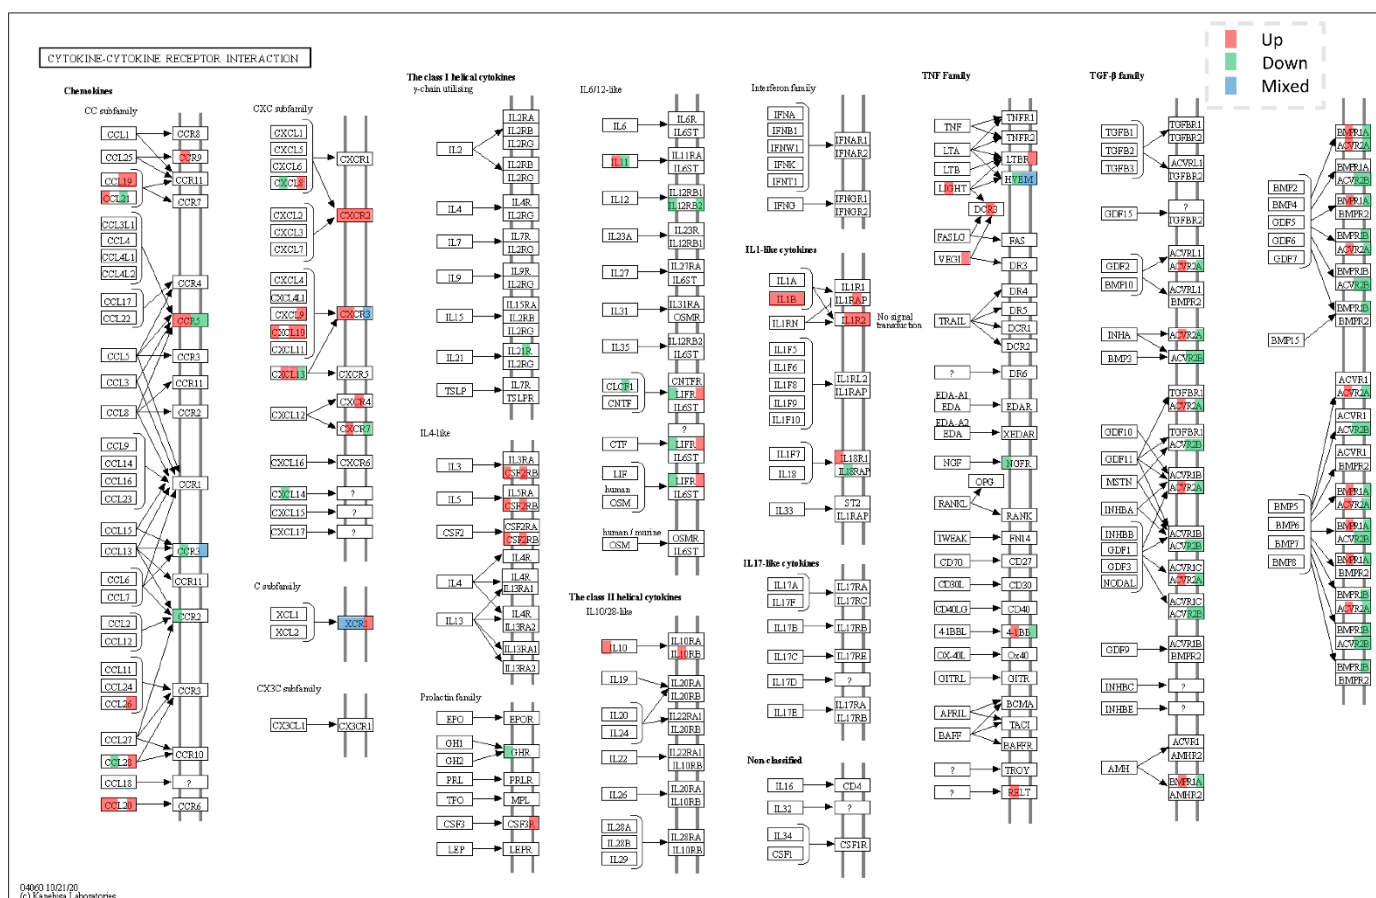

**Figure S3.** Color pathway of cytokine-cytokine receptor interaction. The rectangles of putative protein were equally divided into four parts from left to right corresponding to four comparisons (B6h vs. P6h, B9h vs. P9h, B15h vs. P15h, and B18h vs. P18h). The green and red background colors in the rectangles represented the down-regulated and up-regulated genes, respectively. The blue background in the rectangles represented genes encoded this protein showed both upregulation and downregulation.

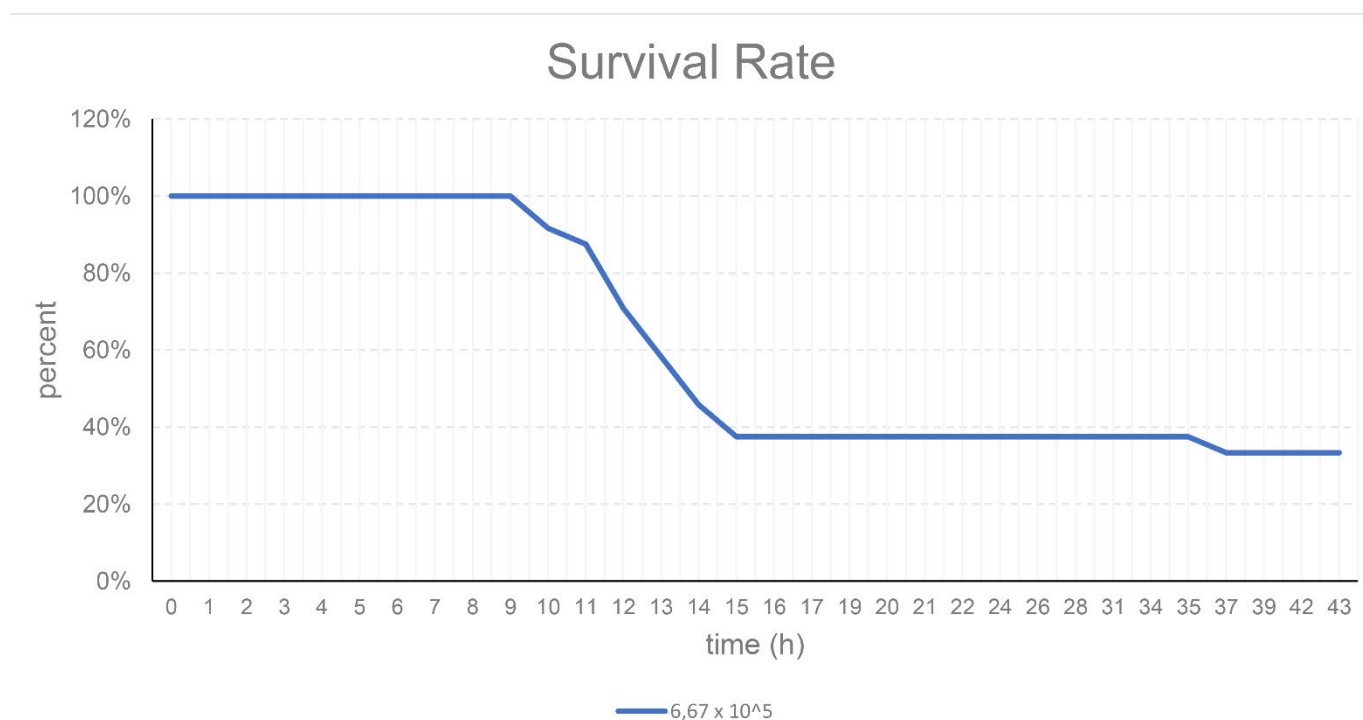

**Figure S4.** Survival rate of experimental tilapia injected with GBS at different time points.

**Table S1.** See Supplementary Materials.
