# Supplementary material
Source: MDPI journal article supplement (https://www.mdpi.com/2410-3888/7/5/246)
Supplement: s1 [file s1 › Table S1. GO enrichment result.xlsx]

## Sheet: B6h vs P6h
#Domain	GO_ID	Term	Annotated	Significant	Expected	KS	Gene
Biological Process	GO:0006955	immune response	194	33	11.43	2.3e-14	Oreochromis_niloticus_newGene_1877;Oreochromis_niloticus_newGene_19089;Oreochromis_niloticus_newGene_21339;Oreochromis_niloticus_newGene_2157;Oreochromis_niloticus_newGene_2160;Oreochromis_niloticus_newGene_25181;Oreochromis_niloticus_newGene_28255;Oreochromis_niloticus_newGene_7236;Oreochromis_niloticus_newGene_736;Oreochromis_niloticus_newGene_8827;gene:ENSONIG00000003384;gene:ENSONIG0000000390…
Biological Process	GO:0010951	negative regulation of endopeptidase activity	46	13	2.71	3.5e-08	Oreochromis_niloticus_newGene_11528;Oreochromis_niloticus_newGene_20764;Oreochromis_niloticus_newGene_29444;Oreochromis_niloticus_newGene_30141;Oreochromis_niloticus_newGene_30256;Oreochromis_niloticus_newGene_31772;Oreochromis_niloticus_newGene_7890;Oreochromis_niloticus_newGene_7892;gene:ENSONIG00000001190;gene:ENSONIG00000012154;gene:ENSONIG00000016413;gene:ENSONIG00000016456;gene:ENSONIG00000…
Biological Process	GO:0045087	innate immune response	45	7	2.65	0.00021	Oreochromis_niloticus_newGene_21339;Oreochromis_niloticus_newGene_7236;gene:ENSONIG00000004651;gene:ENSONIG00000006858;gene:ENSONIG00000011123;gene:ENSONIG00000015210;gene:ENSONIG00000018652
Biological Process	GO:0042742	defense response to bacterium	43	5	2.53	0.00035	Oreochromis_niloticus_newGene_24687;gene:ENSONIG00000011308;gene:ENSONIG00000015063;gene:ENSONIG00000015210;gene:ENSONIG00000018303
Biological Process	GO:0002504	antigen processing and presentation of peptide or polysaccharide antigen via MHC class II	30	8	1.77	0.00106	Oreochromis_niloticus_newGene_8827;gene:ENSONIG00000003904;gene:ENSONIG00000005905;gene:ENSONIG00000007449;gene:ENSONIG00000012441;gene:ENSONIG00000019933;gene:ENSONIG00000019940;gene:ENSONIG00000019943
Biological Process	GO:0006508	proteolysis	660	78	38.9	0.00117	Oreochromis_niloticus_newGene_11528;Oreochromis_niloticus_newGene_11876;Oreochromis_niloticus_newGene_17540;Oreochromis_niloticus_newGene_20764;Oreochromis_niloticus_newGene_29444;Oreochromis_niloticus_newGene_30141;Oreochromis_niloticus_newGene_30256;Oreochromis_niloticus_newGene_31772;Oreochromis_niloticus_newGene_31939;Oreochromis_niloticus_newGene_31940;Oreochromis_niloticus_newGene_3868;Oreo…
Biological Process	GO:0007155	cell adhesion	265	25	15.62	0.00378	Oreochromis_niloticus_newGene_15909;Oreochromis_niloticus_newGene_17287;Oreochromis_niloticus_newGene_17330;Oreochromis_niloticus_newGene_2209;Oreochromis_niloticus_newGene_31795;Oreochromis_niloticus_newGene_31799;gene:ENSONIG00000001054;gene:ENSONIG00000001113;gene:ENSONIG00000004756;gene:ENSONIG00000005119;gene:ENSONIG00000005846;gene:ENSONIG00000006596;gene:ENSONIG00000006599;gene:ENSONIG0000…
Biological Process	GO:0098656	anion transmembrane transport	46	5	2.71	0.00638	gene:ENSONIG00000004815;gene:ENSONIG00000005101;gene:ENSONIG00000009062;gene:ENSONIG00000010677;gene:ENSONIG00000017619
Biological Process	GO:0019882	antigen processing and presentation	70	14	4.13	0.00796	Oreochromis_niloticus_newGene_28255;Oreochromis_niloticus_newGene_736;Oreochromis_niloticus_newGene_8827;gene:ENSONIG00000003904;gene:ENSONIG00000005063;gene:ENSONIG00000005905;gene:ENSONIG00000007449;gene:ENSONIG00000012437;gene:ENSONIG00000012441;gene:ENSONIG00000015362;gene:ENSONIG00000017390;gene:ENSONIG00000019933;gene:ENSONIG00000019940;gene:ENSONIG00000019943
Biological Process	GO:0006956	complement activation	17	6	1	0.00807	Oreochromis_niloticus_newGene_19089;gene:ENSONIG00000004932;gene:ENSONIG00000011123;gene:ENSONIG00000016665;gene:ENSONIG00000017257;gene:ENSONIG00000018652
Cellular Component	GO:0016021	integral component of membrane	2893	182	174.39	9.7e-11	Oreochromis_niloticus_newGene_10785;Oreochromis_niloticus_newGene_11584;Oreochromis_niloticus_newGene_11876;Oreochromis_niloticus_newGene_13063;Oreochromis_niloticus_newGene_14218;Oreochromis_niloticus_newGene_14528;Oreochromis_niloticus_newGene_14529;Oreochromis_niloticus_newGene_14530;Oreochromis_niloticus_newGene_14576;Oreochromis_niloticus_newGene_14583;Oreochromis_niloticus_newGene_14986;Ore…
Cellular Component	GO:0016020	membrane	4182	253	252.09	5.5e-05	Oreochromis_niloticus_newGene_1;Oreochromis_niloticus_newGene_10705;Oreochromis_niloticus_newGene_10785;Oreochromis_niloticus_newGene_11469;Oreochromis_niloticus_newGene_11584;Oreochromis_niloticus_newGene_11876;Oreochromis_niloticus_newGene_13063;Oreochromis_niloticus_newGene_14218;Oreochromis_niloticus_newGene_14528;Oreochromis_niloticus_newGene_14529;Oreochromis_niloticus_newGene_14530;Oreochr…
Cellular Component	GO:0042613	MHC class II protein complex	33	8	1.99	0.00023	Oreochromis_niloticus_newGene_8827;gene:ENSONIG00000003904;gene:ENSONIG00000005905;gene:ENSONIG00000007449;gene:ENSONIG00000012441;gene:ENSONIG00000019933;gene:ENSONIG00000019940;gene:ENSONIG00000019943
Cellular Component	GO:0005615	extracellular space	120	19	7.23	0.00183	Oreochromis_niloticus_newGene_2157;Oreochromis_niloticus_newGene_2160;Oreochromis_niloticus_newGene_29444;Oreochromis_niloticus_newGene_29497;Oreochromis_niloticus_newGene_30141;Oreochromis_niloticus_newGene_32358;Oreochromis_niloticus_newGene_6994;Oreochromis_niloticus_newGene_7236;Oreochromis_niloticus_newGene_7890;Oreochromis_niloticus_newGene_7892;Oreochromis_niloticus_newGene_8403;gene:ENSON…
Cellular Component	GO:0005576	extracellular region	582	66	35.08	0.00319	Oreochromis_niloticus_newGene_11100;Oreochromis_niloticus_newGene_1877;Oreochromis_niloticus_newGene_2157;Oreochromis_niloticus_newGene_2160;Oreochromis_niloticus_newGene_25181;Oreochromis_niloticus_newGene_29444;Oreochromis_niloticus_newGene_29497;Oreochromis_niloticus_newGene_30141;Oreochromis_niloticus_newGene_32358;Oreochromis_niloticus_newGene_5218;Oreochromis_niloticus_newGene_6994;Oreochro…
Cellular Component	GO:0016459	myosin complex	66	8	3.98	0.00395	Oreochromis_niloticus_newGene_11115;Oreochromis_niloticus_newGene_11116;Oreochromis_niloticus_newGene_12665;Oreochromis_niloticus_newGene_19173;Oreochromis_niloticus_newGene_2938;gene:ENSONIG00000001401;gene:ENSONIG00000008299;gene:ENSONIG00000018232
Molecular Function	GO:0004252	serine-type endopeptidase activity	158	32	9.86	8.3e-06	Oreochromis_niloticus_newGene_11876;Oreochromis_niloticus_newGene_9278;gene:ENSONIG00000000934;gene:ENSONIG00000002124;gene:ENSONIG00000002825;gene:ENSONIG00000003237;gene:ENSONIG00000003998;gene:ENSONIG00000004932;gene:ENSONIG00000005458;gene:ENSONIG00000005862;gene:ENSONIG00000006849;gene:ENSONIG00000006852;gene:ENSONIG00000006953;gene:ENSONIG00000008965;gene:ENSONIG00000008990;gene:ENSONIG0000…
Molecular Function	GO:0020037	heme binding	142	9	8.86	9.6e-06	Oreochromis_niloticus_newGene_21356;gene:ENSONIG00000001039;gene:ENSONIG00000001489;gene:ENSONIG00000002615;gene:ENSONIG00000011757;gene:ENSONIG00000014062;gene:ENSONIG00000015391;gene:ENSONIG00000017055;gene:ENSONIG00000019774
Molecular Function	GO:0005506	iron ion binding	185	13	11.55	4.5e-05	Oreochromis_niloticus_newGene_21356;gene:ENSONIG00000001039;gene:ENSONIG00000001489;gene:ENSONIG00000002615;gene:ENSONIG00000009845;gene:ENSONIG00000013203;gene:ENSONIG00000013402;gene:ENSONIG00000014062;gene:ENSONIG00000014479;gene:ENSONIG00000015391;gene:ENSONIG00000017055;gene:ENSONIG00000019131;gene:ENSONIG00000019774
Molecular Function	GO:0003774	motor activity	112	11	6.99	8.5e-05	Oreochromis_niloticus_newGene_11115;Oreochromis_niloticus_newGene_11116;Oreochromis_niloticus_newGene_12665;Oreochromis_niloticus_newGene_19173;Oreochromis_niloticus_newGene_20286;Oreochromis_niloticus_newGene_25102;Oreochromis_niloticus_newGene_2938;Oreochromis_niloticus_newGene_3164;gene:ENSONIG00000001401;gene:ENSONIG00000008299;gene:ENSONIG00000018232
Molecular Function	GO:0003824	catalytic activity	4953	322	309.17	0.00013	Oreochromis_niloticus_newGene_10052;Oreochromis_niloticus_newGene_10705;Oreochromis_niloticus_newGene_11115;Oreochromis_niloticus_newGene_11116;Oreochromis_niloticus_newGene_11876;Oreochromis_niloticus_newGene_12665;Oreochromis_niloticus_newGene_13063;Oreochromis_niloticus_newGene_14218;Oreochromis_niloticus_newGene_15491;Oreochromis_niloticus_newGene_15676;Oreochromis_niloticus_newGene_16780;Ore…
Molecular Function	GO:0004866	endopeptidase inhibitor activity	80	18	4.99	0.00175	Oreochromis_niloticus_newGene_11528;Oreochromis_niloticus_newGene_20764;Oreochromis_niloticus_newGene_29444;Oreochromis_niloticus_newGene_30141;Oreochromis_niloticus_newGene_30256;Oreochromis_niloticus_newGene_31772;Oreochromis_niloticus_newGene_7890;Oreochromis_niloticus_newGene_7892;gene:ENSONIG00000001190;gene:ENSONIG00000003882;gene:ENSONIG00000007781;gene:ENSONIG00000012154;gene:ENSONIG00000…
Molecular Function	GO:0016705	oxidoreductase activity, acting on paired donors, with incorporation or reduction of molecular oxygen	180	14	11.24	0.00175	Oreochromis_niloticus_newGene_15676;Oreochromis_niloticus_newGene_17858;Oreochromis_niloticus_newGene_21356;gene:ENSONIG00000000161;gene:ENSONIG00000001039;gene:ENSONIG00000002615;gene:ENSONIG00000003249;gene:ENSONIG00000005252;gene:ENSONIG00000007584;gene:ENSONIG00000013203;gene:ENSONIG00000014062;gene:ENSONIG00000015391;gene:ENSONIG00000017055;gene:ENSONIG00000018076
Molecular Function	GO:0003779	actin binding	147	12	9.18	0.00295	Oreochromis_niloticus_newGene_11115;Oreochromis_niloticus_newGene_11116;Oreochromis_niloticus_newGene_12665;Oreochromis_niloticus_newGene_17478;Oreochromis_niloticus_newGene_2938;gene:ENSONIG00000001054;gene:ENSONIG00000008050;gene:ENSONIG00000008299;gene:ENSONIG00000010646;gene:ENSONIG00000011715;gene:ENSONIG00000019579;gene:ENSONIG00000019928
Molecular Function	GO:0051213	dioxygenase activity	74	7	4.62	0.00383	Oreochromis_niloticus_newGene_10052;Oreochromis_niloticus_newGene_15676;Oreochromis_niloticus_newGene_17858;gene:ENSONIG00000012748;gene:ENSONIG00000013203;gene:ENSONIG00000013402;gene:ENSONIG00000014479
Molecular Function	GO:0005524	ATP binding	1195	70	74.59	0.00567	Oreochromis_niloticus_newGene_11115;Oreochromis_niloticus_newGene_11116;Oreochromis_niloticus_newGene_12665;Oreochromis_niloticus_newGene_16809;Oreochromis_niloticus_newGene_17937;Oreochromis_niloticus_newGene_18064;Oreochromis_niloticus_newGene_1881;Oreochromis_niloticus_newGene_19173;Oreochromis_niloticus_newGene_20286;Oreochromis_niloticus_newGene_25102;Oreochromis_niloticus_newGene_25287;Oreo…
Molecular Function	GO:0004867	serine-type endopeptidase inhibitor activity	46	9	2.87	0.00657	Oreochromis_niloticus_newGene_30256;gene:ENSONIG00000001190;gene:ENSONIG00000003882;gene:ENSONIG00000007781;gene:ENSONIG00000012154;gene:ENSONIG00000014348;gene:ENSONIG00000014618;gene:ENSONIG00000017917;gene:ENSONIG00000020144

## Sheet: B9h vs P9h
#Domain	GO_ID	Term	Annotated	Significant	Expected	KS	Gene
Biological Process	GO:0006955	immune response	194	40	10.56	2e-16	Oreochromis_niloticus_newGene_1072;Oreochromis_niloticus_newGene_1877;Oreochromis_niloticus_newGene_19089;Oreochromis_niloticus_newGene_2157;Oreochromis_niloticus_newGene_2160;Oreochromis_niloticus_newGene_2218;Oreochromis_niloticus_newGene_22888;Oreochromis_niloticus_newGene_25170;Oreochromis_niloticus_newGene_25180;Oreochromis_niloticus_newGene_25181;Oreochromis_niloticus_newGene_28255;Oreochro…
Biological Process	GO:0060326	cell chemotaxis	33	11	1.8	1.9e-13	Oreochromis_niloticus_newGene_1072;Oreochromis_niloticus_newGene_1877;Oreochromis_niloticus_newGene_2218;Oreochromis_niloticus_newGene_25170;Oreochromis_niloticus_newGene_25180;Oreochromis_niloticus_newGene_25181;Oreochromis_niloticus_newGene_3687;Oreochromis_niloticus_newGene_7588;gene:ENSONIG00000003911;gene:ENSONIG00000007414;gene:ENSONIG00000020434
Biological Process	GO:0010951	negative regulation of endopeptidase activity	46	13	2.5	1.5e-08	Oreochromis_niloticus_newGene_11528;Oreochromis_niloticus_newGene_1157;Oreochromis_niloticus_newGene_29444;Oreochromis_niloticus_newGene_30141;Oreochromis_niloticus_newGene_31772;Oreochromis_niloticus_newGene_7890;Oreochromis_niloticus_newGene_7892;gene:ENSONIG00000000645;gene:ENSONIG00000001190;gene:ENSONIG00000002961;gene:ENSONIG00000016413;gene:ENSONIG00000016456;gene:ENSONIG00000017917
Biological Process	GO:0042742	defense response to bacterium	43	8	2.34	2e-05	Oreochromis_niloticus_newGene_18816;Oreochromis_niloticus_newGene_24687;gene:ENSONIG00000003911;gene:ENSONIG00000004497;gene:ENSONIG00000005404;gene:ENSONIG00000015063;gene:ENSONIG00000015210;gene:ENSONIG00000018303
Biological Process	GO:0002504	antigen processing and presentation of peptide or polysaccharide antigen via MHC class II	30	9	1.63	0.00023	Oreochromis_niloticus_newGene_9857;gene:ENSONIG00000003904;gene:ENSONIG00000007446;gene:ENSONIG00000007449;gene:ENSONIG00000007453;gene:ENSONIG00000008338;gene:ENSONIG00000012441;gene:ENSONIG00000019940;gene:ENSONIG00000019943
Biological Process	GO:0045087	innate immune response	45	7	2.45	0.00029	Oreochromis_niloticus_newGene_31855;Oreochromis_niloticus_newGene_7236;Oreochromis_niloticus_newGene_7252;gene:ENSONIG00000004497;gene:ENSONIG00000011123;gene:ENSONIG00000015210;gene:ENSONIG00000018652
Biological Process	GO:0006508	proteolysis	660	78	35.93	0.00191	Oreochromis_niloticus_newGene_11528;Oreochromis_niloticus_newGene_1157;Oreochromis_niloticus_newGene_17406;Oreochromis_niloticus_newGene_29444;Oreochromis_niloticus_newGene_30141;Oreochromis_niloticus_newGene_31168;Oreochromis_niloticus_newGene_31772;Oreochromis_niloticus_newGene_3868;Oreochromis_niloticus_newGene_6270;Oreochromis_niloticus_newGene_7890;Oreochromis_niloticus_newGene_7892;Oreochro…
Biological Process	GO:0008152	metabolic process	6214	353	338.27	0.00513	Oreochromis_niloticus_newGene_10051;Oreochromis_niloticus_newGene_10052;Oreochromis_niloticus_newGene_10285;Oreochromis_niloticus_newGene_11061;Oreochromis_niloticus_newGene_11283;Oreochromis_niloticus_newGene_11528;Oreochromis_niloticus_newGene_1157;Oreochromis_niloticus_newGene_1238;Oreochromis_niloticus_newGene_13760;Oreochromis_niloticus_newGene_14722;Oreochromis_niloticus_newGene_15324;Oreoc…
Biological Process	GO:0098542	defense response to other organism	66	11	3.59	0.00538	Oreochromis_niloticus_newGene_18816;Oreochromis_niloticus_newGene_24687;Oreochromis_niloticus_newGene_7236;Oreochromis_niloticus_newGene_7252;gene:ENSONIG00000003911;gene:ENSONIG00000004497;gene:ENSONIG00000005404;gene:ENSONIG00000015063;gene:ENSONIG00000015210;gene:ENSONIG00000015290;gene:ENSONIG00000018303
Biological Process	GO:0007155	cell adhesion	265	24	14.43	0.00876	Oreochromis_niloticus_newGene_15909;Oreochromis_niloticus_newGene_17181;Oreochromis_niloticus_newGene_18162;Oreochromis_niloticus_newGene_2209;gene:ENSONIG00000000223;gene:ENSONIG00000000305;gene:ENSONIG00000001054;gene:ENSONIG00000001113;gene:ENSONIG00000003273;gene:ENSONIG00000003336;gene:ENSONIG00000005846;gene:ENSONIG00000007003;gene:ENSONIG00000010322;gene:ENSONIG00000013782;gene:ENSONIG0000…
Biological Process	GO:0002474	antigen processing and presentation of peptide antigen via MHC class I	25	5	1.36	0.00947	Oreochromis_niloticus_newGene_22888;Oreochromis_niloticus_newGene_28255;Oreochromis_niloticus_newGene_736;gene:ENSONIG00000008407;gene:ENSONIG00000016101
Cellular Component	GO:0016021	integral component of membrane	2893	129	145.32	1e-08	Oreochromis_niloticus_newGene_11283;Oreochromis_niloticus_newGene_12635;Oreochromis_niloticus_newGene_1295;Oreochromis_niloticus_newGene_14583;Oreochromis_niloticus_newGene_17858;Oreochromis_niloticus_newGene_18162;Oreochromis_niloticus_newGene_18350;Oreochromis_niloticus_newGene_18362;Oreochromis_niloticus_newGene_20234;Oreochromis_niloticus_newGene_20306;Oreochromis_niloticus_newGene_20462;Oreo…
Cellular Component	GO:0042613	MHC class II protein complex	33	9	1.66	3.2e-05	Oreochromis_niloticus_newGene_9857;gene:ENSONIG00000003904;gene:ENSONIG00000007446;gene:ENSONIG00000007449;gene:ENSONIG00000007453;gene:ENSONIG00000008338;gene:ENSONIG00000012441;gene:ENSONIG00000019940;gene:ENSONIG00000019943
Cellular Component	GO:0016020	membrane	4182	197	210.07	3.3e-05	Oreochromis_niloticus_newGene_1;Oreochromis_niloticus_newGene_11061;Oreochromis_niloticus_newGene_11283;Oreochromis_niloticus_newGene_11469;Oreochromis_niloticus_newGene_1163;Oreochromis_niloticus_newGene_12635;Oreochromis_niloticus_newGene_1295;Oreochromis_niloticus_newGene_14583;Oreochromis_niloticus_newGene_15031;Oreochromis_niloticus_newGene_15965;Oreochromis_niloticus_newGene_16536;Oreochrom…
Cellular Component	GO:0005615	extracellular space	120	17	6.03	0.00114	Oreochromis_niloticus_newGene_2157;Oreochromis_niloticus_newGene_2160;Oreochromis_niloticus_newGene_29444;Oreochromis_niloticus_newGene_30141;Oreochromis_niloticus_newGene_3687;Oreochromis_niloticus_newGene_7236;Oreochromis_niloticus_newGene_7252;Oreochromis_niloticus_newGene_7890;Oreochromis_niloticus_newGene_7892;gene:ENSONIG00000000645;gene:ENSONIG00000003245;gene:ENSONIG00000006713;gene:ENSON…
Cellular Component	GO:0016459	myosin complex	66	5	3.32	0.00616	Oreochromis_niloticus_newGene_11115;Oreochromis_niloticus_newGene_3110;Oreochromis_niloticus_newGene_31426;gene:ENSONIG00000018235;gene:ENSONIG00000021261
Cellular Component	GO:0030016	myofibril	43	11	2.16	0.00794	Oreochromis_niloticus_newGene_1655;Oreochromis_niloticus_newGene_3110;Oreochromis_niloticus_newGene_31426;gene:ENSONIG00000000819;gene:ENSONIG00000001730;gene:ENSONIG00000005683;gene:ENSONIG00000008665;gene:ENSONIG00000011494;gene:ENSONIG00000011575;gene:ENSONIG00000012310;gene:ENSONIG00000014705
Molecular Function	GO:0008009	chemokine activity	36	11	1.97	1e-11	Oreochromis_niloticus_newGene_1072;Oreochromis_niloticus_newGene_1877;Oreochromis_niloticus_newGene_2218;Oreochromis_niloticus_newGene_25170;Oreochromis_niloticus_newGene_25180;Oreochromis_niloticus_newGene_25181;Oreochromis_niloticus_newGene_3687;Oreochromis_niloticus_newGene_7588;gene:ENSONIG00000006497;gene:ENSONIG00000010866;gene:ENSONIG00000010877
Molecular Function	GO:0020037	heme binding	142	11	7.79	5.5e-06	Oreochromis_niloticus_newGene_21356;Oreochromis_niloticus_newGene_38;Oreochromis_niloticus_newGene_7724;gene:ENSONIG00000001457;gene:ENSONIG00000001939;gene:ENSONIG00000003246;gene:ENSONIG00000010015;gene:ENSONIG00000010213;gene:ENSONIG00000013339;gene:ENSONIG00000019773;gene:ENSONIG00000019774
Molecular Function	GO:0004252	serine-type endopeptidase activity	158	33	8.66	4.9e-05	Oreochromis_niloticus_newGene_17406;gene:ENSONIG00000002124;gene:ENSONIG00000002140;gene:ENSONIG00000002378;gene:ENSONIG00000003237;gene:ENSONIG00000003245;gene:ENSONIG00000003998;gene:ENSONIG00000004445;gene:ENSONIG00000004932;gene:ENSONIG00000005268;gene:ENSONIG00000005276;gene:ENSONIG00000005280;gene:ENSONIG00000005292;gene:ENSONIG00000005458;gene:ENSONIG00000006849;gene:ENSONIG00000006852;gen…
Molecular Function	GO:0005506	iron ion binding	185	15	10.14	5.7e-05	Oreochromis_niloticus_newGene_10051;Oreochromis_niloticus_newGene_21356;Oreochromis_niloticus_newGene_38;Oreochromis_niloticus_newGene_7724;gene:ENSONIG00000001457;gene:ENSONIG00000001939;gene:ENSONIG00000003246;gene:ENSONIG00000009419;gene:ENSONIG00000009845;gene:ENSONIG00000010213;gene:ENSONIG00000014479;gene:ENSONIG00000017517;gene:ENSONIG00000019131;gene:ENSONIG00000019773;gene:ENSONIG0000001…
Molecular Function	GO:0004866	endopeptidase inhibitor activity	80	19	4.39	8.9e-05	Oreochromis_niloticus_newGene_11528;Oreochromis_niloticus_newGene_1157;Oreochromis_niloticus_newGene_29444;Oreochromis_niloticus_newGene_30141;Oreochromis_niloticus_newGene_31772;Oreochromis_niloticus_newGene_7890;Oreochromis_niloticus_newGene_7892;gene:ENSONIG00000000645;gene:ENSONIG00000001190;gene:ENSONIG00000002115;gene:ENSONIG00000002961;gene:ENSONIG00000003882;gene:ENSONIG00000007781;gene:E…
Molecular Function	GO:0003824	catalytic activity	4953	276	271.6	9.1e-05	Oreochromis_niloticus_newGene_10051;Oreochromis_niloticus_newGene_10052;Oreochromis_niloticus_newGene_10285;Oreochromis_niloticus_newGene_11061;Oreochromis_niloticus_newGene_11115;Oreochromis_niloticus_newGene_11283;Oreochromis_niloticus_newGene_11900;Oreochromis_niloticus_newGene_1238;Oreochromis_niloticus_newGene_15593;Oreochromis_niloticus_newGene_15676;Oreochromis_niloticus_newGene_16323;Oreo…
Molecular Function	GO:0003774	motor activity	112	6	6.14	0.00017	Oreochromis_niloticus_newGene_11115;Oreochromis_niloticus_newGene_25102;Oreochromis_niloticus_newGene_3110;Oreochromis_niloticus_newGene_31426;gene:ENSONIG00000018235;gene:ENSONIG00000021261
Molecular Function	GO:0051213	dioxygenase activity	74	10	4.06	0.00049	Oreochromis_niloticus_newGene_10051;Oreochromis_niloticus_newGene_10052;Oreochromis_niloticus_newGene_15676;Oreochromis_niloticus_newGene_17858;gene:ENSONIG00000007448;gene:ENSONIG00000009419;gene:ENSONIG00000010836;gene:ENSONIG00000014479;gene:ENSONIG00000017517;gene:ENSONIG00000021007
Molecular Function	GO:0030246	carbohydrate binding	156	16	8.55	0.00387	Oreochromis_niloticus_newGene_6432;gene:ENSONIG00000001476;gene:ENSONIG00000004811;gene:ENSONIG00000006626;gene:ENSONIG00000008696;gene:ENSONIG00000009178;gene:ENSONIG00000009614;gene:ENSONIG00000009625;gene:ENSONIG00000009629;gene:ENSONIG00000013029;gene:ENSONIG00000013034;gene:ENSONIG00000013207;gene:ENSONIG00000014109;gene:ENSONIG00000014110;gene:ENSONIG00000014952;gene:ENSONIG00000019098
Molecular Function	GO:0005524	ATP binding	1195	60	65.53	0.00477	Oreochromis_niloticus_newGene_10762;Oreochromis_niloticus_newGene_11115;Oreochromis_niloticus_newGene_11703;Oreochromis_niloticus_newGene_1881;Oreochromis_niloticus_newGene_21994;Oreochromis_niloticus_newGene_25102;Oreochromis_niloticus_newGene_26673;Oreochromis_niloticus_newGene_28494;Oreochromis_niloticus_newGene_3110;Oreochromis_niloticus_newGene_31426;Oreochromis_niloticus_newGene_31855;Oreoc…
Molecular Function	GO:0003779	actin binding	147	9	8.06	0.00625	Oreochromis_niloticus_newGene_11115;Oreochromis_niloticus_newGene_3110;Oreochromis_niloticus_newGene_31426;gene:ENSONIG00000001054;gene:ENSONIG00000001730;gene:ENSONIG00000004973;gene:ENSONIG00000014705;gene:ENSONIG00000018235;gene:ENSONIG00000021261
Molecular Function	GO:0004867	serine-type endopeptidase inhibitor activity	46	8	2.52	0.00778	gene:ENSONIG00000001190;gene:ENSONIG00000002115;gene:ENSONIG00000003882;gene:ENSONIG00000007781;gene:ENSONIG00000011009;gene:ENSONIG00000014348;gene:ENSONIG00000014618;gene:ENSONIG00000017917

## Sheet: B15h vs P15h
#Domain	GO_ID	Term	Annotated	Significant	Expected	KS	Gene
Biological Process	GO:0006955	immune response	194	39	9.37	1.8e-16	Oreochromis_niloticus_newGene_1877;Oreochromis_niloticus_newGene_19089;Oreochromis_niloticus_newGene_21339;Oreochromis_niloticus_newGene_2157;Oreochromis_niloticus_newGene_2160;Oreochromis_niloticus_newGene_2218;Oreochromis_niloticus_newGene_25180;Oreochromis_niloticus_newGene_25181;Oreochromis_niloticus_newGene_25930;Oreochromis_niloticus_newGene_26844;Oreochromis_niloticus_newGene_28255;Oreochr…
Biological Process	GO:0060326	cell chemotaxis	33	8	1.59	1.6e-12	Oreochromis_niloticus_newGene_1877;Oreochromis_niloticus_newGene_2218;Oreochromis_niloticus_newGene_25180;Oreochromis_niloticus_newGene_25181;Oreochromis_niloticus_newGene_25930;Oreochromis_niloticus_newGene_7588;gene:ENSONIG00000004410;gene:ENSONIG00000007414
Biological Process	GO:0045087	innate immune response	45	6	2.17	0.00022	Oreochromis_niloticus_newGene_21339;Oreochromis_niloticus_newGene_31855;gene:ENSONIG00000004497;gene:ENSONIG00000004651;gene:ENSONIG00000006858;gene:ENSONIG00000015210
Biological Process	GO:0042742	defense response to bacterium	43	4	2.08	0.00071	Oreochromis_niloticus_newGene_24687;gene:ENSONIG00000004497;gene:ENSONIG00000005404;gene:ENSONIG00000015210
Biological Process	GO:0002504	antigen processing and presentation of peptide or polysaccharide antigen via MHC class II	30	10	1.45	0.00077	Oreochromis_niloticus_newGene_26844;Oreochromis_niloticus_newGene_29572;Oreochromis_niloticus_newGene_9857;gene:ENSONIG00000003904;gene:ENSONIG00000007446;gene:ENSONIG00000007453;gene:ENSONIG00000008338;gene:ENSONIG00000019933;gene:ENSONIG00000019940;gene:ENSONIG00000019943
Cellular Component	GO:0016021	integral component of membrane	2893	133	132.56	5e-10	Oreochromis_niloticus_newGene_10161;Oreochromis_niloticus_newGene_11283;Oreochromis_niloticus_newGene_11876;Oreochromis_niloticus_newGene_1301;Oreochromis_niloticus_newGene_13856;Oreochromis_niloticus_newGene_17330;Oreochromis_niloticus_newGene_17858;Oreochromis_niloticus_newGene_18350;Oreochromis_niloticus_newGene_18362;Oreochromis_niloticus_newGene_18890;Oreochromis_niloticus_newGene_1903;Oreoc…
Cellular Component	GO:0016020	membrane	4182	191	191.63	2.7e-05	Oreochromis_niloticus_newGene_1;Oreochromis_niloticus_newGene_10161;Oreochromis_niloticus_newGene_10420;Oreochromis_niloticus_newGene_11283;Oreochromis_niloticus_newGene_11876;Oreochromis_niloticus_newGene_12632;Oreochromis_niloticus_newGene_1301;Oreochromis_niloticus_newGene_13856;Oreochromis_niloticus_newGene_14943;Oreochromis_niloticus_newGene_15664;Oreochromis_niloticus_newGene_17330;Oreochro…
Cellular Component	GO:0042613	MHC class II protein complex	33	11	1.51	0.00012	Oreochromis_niloticus_newGene_26844;Oreochromis_niloticus_newGene_29572;Oreochromis_niloticus_newGene_8966;Oreochromis_niloticus_newGene_9857;gene:ENSONIG00000003904;gene:ENSONIG00000007446;gene:ENSONIG00000007453;gene:ENSONIG00000008338;gene:ENSONIG00000019933;gene:ENSONIG00000019940;gene:ENSONIG00000019943
Molecular Function	GO:0008009	chemokine activity	36	9	1.8	6.9e-12	Oreochromis_niloticus_newGene_1877;Oreochromis_niloticus_newGene_2218;Oreochromis_niloticus_newGene_25180;Oreochromis_niloticus_newGene_25181;Oreochromis_niloticus_newGene_25930;Oreochromis_niloticus_newGene_7588;gene:ENSONIG00000003384;gene:ENSONIG00000013990;gene:ENSONIG00000014063
Molecular Function	GO:0005506	iron ion binding	185	24	9.27	3.2e-08	Oreochromis_niloticus_newGene_10051;Oreochromis_niloticus_newGene_21356;Oreochromis_niloticus_newGene_8906;gene:ENSONIG00000002612;gene:ENSONIG00000002935;gene:ENSONIG00000002989;gene:ENSONIG00000003246;gene:ENSONIG00000004257;gene:ENSONIG00000005233;gene:ENSONIG00000005854;gene:ENSONIG00000006891;gene:ENSONIG00000009017;gene:ENSONIG00000009414;gene:ENSONIG00000009845;gene:ENSONIG00000010213;gene…
Molecular Function	GO:0020037	heme binding	142	12	7.11	3.3e-07	Oreochromis_niloticus_newGene_21356;Oreochromis_niloticus_newGene_8906;gene:ENSONIG00000002612;gene:ENSONIG00000002935;gene:ENSONIG00000003246;gene:ENSONIG00000005233;gene:ENSONIG00000006891;gene:ENSONIG00000010213;gene:ENSONIG00000010591;gene:ENSONIG00000017055;gene:ENSONIG00000019774;gene:ENSONIG00000021031
Molecular Function	GO:0016712	oxidoreductase activity, acting on paired donors, with incorporation or reduction of molecular oxygen, reduced flavin or flavoprotein as one donor, and incorporation of one atom of oxygen	40	4	2	3.8e-06	gene:ENSONIG00000002612;gene:ENSONIG00000002935;gene:ENSONIG00000005233;gene:ENSONIG00000010213
Molecular Function	GO:0003823	antigen binding	25	4	1.25	4.4e-05	Oreochromis_niloticus_newGene_28255;Oreochromis_niloticus_newGene_736;gene:ENSONIG00000012499;gene:ENSONIG00000020058
Molecular Function	GO:0003774	motor activity	112	4	5.61	0.00036	Oreochromis_niloticus_newGene_11114;Oreochromis_niloticus_newGene_11115;Oreochromis_niloticus_newGene_25102;gene:ENSONIG00000001739
Molecular Function	GO:0004866	endopeptidase inhibitor activity	80	6	4.01	0.0008	gene:ENSONIG00000001190;gene:ENSONIG00000005310;gene:ENSONIG00000008795;gene:ENSONIG00000011287;gene:ENSONIG00000014618;gene:ENSONIG00000016533

## Sheet: B18h vs P18h
#Domain	GO_ID	Term	Annotated	Significant	Expected	KS	Gene
Biological Process	GO:0006955	immune response	194	37	13.31	1.6e-14	Oreochromis_niloticus_newGene_1877;Oreochromis_niloticus_newGene_19089;Oreochromis_niloticus_newGene_2157;Oreochromis_niloticus_newGene_2160;Oreochromis_niloticus_newGene_2218;Oreochromis_niloticus_newGene_2232;Oreochromis_niloticus_newGene_22888;Oreochromis_niloticus_newGene_28255;Oreochromis_niloticus_newGene_29572;Oreochromis_niloticus_newGene_31855;Oreochromis_niloticus_newGene_31898;Oreochro…
Biological Process	GO:0060326	cell chemotaxis	33	6	2.26	9e-10	Oreochromis_niloticus_newGene_1877;Oreochromis_niloticus_newGene_2218;Oreochromis_niloticus_newGene_2232;Oreochromis_niloticus_newGene_31898;Oreochromis_niloticus_newGene_3687;Oreochromis_niloticus_newGene_7588
Biological Process	GO:0010951	negative regulation of endopeptidase activity	46	6	3.16	1.4e-06	Oreochromis_niloticus_newGene_30256;Oreochromis_niloticus_newGene_31772;Oreochromis_niloticus_newGene_7890;gene:ENSONIG00000001190;gene:ENSONIG00000013750;gene:ENSONIG00000016456
Biological Process	GO:0015671	oxygen transport	19	7	1.3	1.9e-05	Oreochromis_niloticus_newGene_38;gene:ENSONIG00000001457;gene:ENSONIG00000001470;gene:ENSONIG00000001504;gene:ENSONIG00000019773;gene:ENSONIG00000019774;gene:ENSONIG00000019777
Biological Process	GO:0042742	defense response to bacterium	43	5	2.95	0.00017	gene:ENSONIG00000005404;gene:ENSONIG00000011308;gene:ENSONIG00000012419;gene:ENSONIG00000015210;gene:ENSONIG00000018303
Cellular Component	GO:0016021	integral component of membrane	2893	190	202.39	1.7e-08	Oreochromis_niloticus_newGene_10994;Oreochromis_niloticus_newGene_11876;Oreochromis_niloticus_newGene_12244;Oreochromis_niloticus_newGene_1295;Oreochromis_niloticus_newGene_1331;Oreochromis_niloticus_newGene_14218;Oreochromis_niloticus_newGene_14963;Oreochromis_niloticus_newGene_15757;Oreochromis_niloticus_newGene_17330;Oreochromis_niloticus_newGene_18162;Oreochromis_niloticus_newGene_18350;Oreoc…
Cellular Component	GO:0005833	hemoglobin complex	13	7	0.91	1.8e-07	Oreochromis_niloticus_newGene_38;gene:ENSONIG00000001457;gene:ENSONIG00000001470;gene:ENSONIG00000001504;gene:ENSONIG00000019773;gene:ENSONIG00000019774;gene:ENSONIG00000019777
Cellular Component	GO:0016020	membrane	4182	280	292.57	0.00021	Oreochromis_niloticus_newGene_1;Oreochromis_niloticus_newGene_10994;Oreochromis_niloticus_newGene_11061;Oreochromis_niloticus_newGene_11469;Oreochromis_niloticus_newGene_11876;Oreochromis_niloticus_newGene_12244;Oreochromis_niloticus_newGene_12586;Oreochromis_niloticus_newGene_1295;Oreochromis_niloticus_newGene_1331;Oreochromis_niloticus_newGene_14218;Oreochromis_niloticus_newGene_14943;Oreochrom…
Molecular Function	GO:0008009	chemokine activity	36	11	2.57	3e-13	Oreochromis_niloticus_newGene_1877;Oreochromis_niloticus_newGene_2218;Oreochromis_niloticus_newGene_2232;Oreochromis_niloticus_newGene_31898;Oreochromis_niloticus_newGene_3687;Oreochromis_niloticus_newGene_7588;gene:ENSONIG00000009590;gene:ENSONIG00000010316;gene:ENSONIG00000010877;gene:ENSONIG00000010964;gene:ENSONIG00000014063
Molecular Function	GO:0020037	heme binding	142	20	10.15	4.9e-08	Oreochromis_niloticus_newGene_3172;Oreochromis_niloticus_newGene_38;gene:ENSONIG00000001457;gene:ENSONIG00000001470;gene:ENSONIG00000001504;gene:ENSONIG00000001939;gene:ENSONIG00000002610;gene:ENSONIG00000002615;gene:ENSONIG00000004888;gene:ENSONIG00000005233;gene:ENSONIG00000006146;gene:ENSONIG00000006891;gene:ENSONIG00000011663;gene:ENSONIG00000014910;gene:ENSONIG00000015474;gene:ENSONIG0000001…
Molecular Function	GO:0005506	iron ion binding	185	27	13.22	1.7e-06	Oreochromis_niloticus_newGene_10047;Oreochromis_niloticus_newGene_10050;Oreochromis_niloticus_newGene_10051;Oreochromis_niloticus_newGene_3172;Oreochromis_niloticus_newGene_38;gene:ENSONIG00000001457;gene:ENSONIG00000001470;gene:ENSONIG00000001504;gene:ENSONIG00000001939;gene:ENSONIG00000002610;gene:ENSONIG00000002615;gene:ENSONIG00000002989;gene:ENSONIG00000005233;gene:ENSONIG00000005854;gene:EN…
Molecular Function	GO:0005344	oxygen transporter activity	19	7	1.36	2.8e-05	Oreochromis_niloticus_newGene_38;gene:ENSONIG00000001457;gene:ENSONIG00000001470;gene:ENSONIG00000001504;gene:ENSONIG00000019773;gene:ENSONIG00000019774;gene:ENSONIG00000019777
Molecular Function	GO:0019825	oxygen binding	19	7	1.36	2.8e-05	Oreochromis_niloticus_newGene_38;gene:ENSONIG00000001457;gene:ENSONIG00000001470;gene:ENSONIG00000001504;gene:ENSONIG00000019773;gene:ENSONIG00000019774;gene:ENSONIG00000019777
Molecular Function	GO:0003774	motor activity	112	6	8	0.00017	Oreochromis_niloticus_newGene_11113;Oreochromis_niloticus_newGene_3136;Oreochromis_niloticus_newGene_31426;gene:ENSONIG00000001401;gene:ENSONIG00000004007;gene:ENSONIG00000018235
Molecular Function	GO:0051213	dioxygenase activity	74	13	5.29	0.00023	Oreochromis_niloticus_newGene_10047;Oreochromis_niloticus_newGene_10050;Oreochromis_niloticus_newGene_10051;Oreochromis_niloticus_newGene_10052;Oreochromis_niloticus_newGene_27017;gene:ENSONIG00000005854;gene:ENSONIG00000007448;gene:ENSONIG00000009414;gene:ENSONIG00000012748;gene:ENSONIG00000014479;gene:ENSONIG00000016018;gene:ENSONIG00000017517;gene:ENSONIG00000021007
Molecular Function	GO:0003824	catalytic activity	4953	338	353.98	0.00039	Oreochromis_niloticus_newGene_10047;Oreochromis_niloticus_newGene_10050;Oreochromis_niloticus_newGene_10051;Oreochromis_niloticus_newGene_10052;Oreochromis_niloticus_newGene_11061;Oreochromis_niloticus_newGene_11113;Oreochromis_niloticus_newGene_11876;Oreochromis_niloticus_newGene_12244;Oreochromis_niloticus_newGene_1270;Oreochromis_niloticus_newGene_13642;Oreochromis_niloticus_newGene_13944;Oreo…
